# Supplementary material for: The Protein Structure Context of PolyQ Regions
Source: PubMed Central journal article supplement (PMC5268486; doi:10.1371/journal.pone.0170801), 2017-01-26

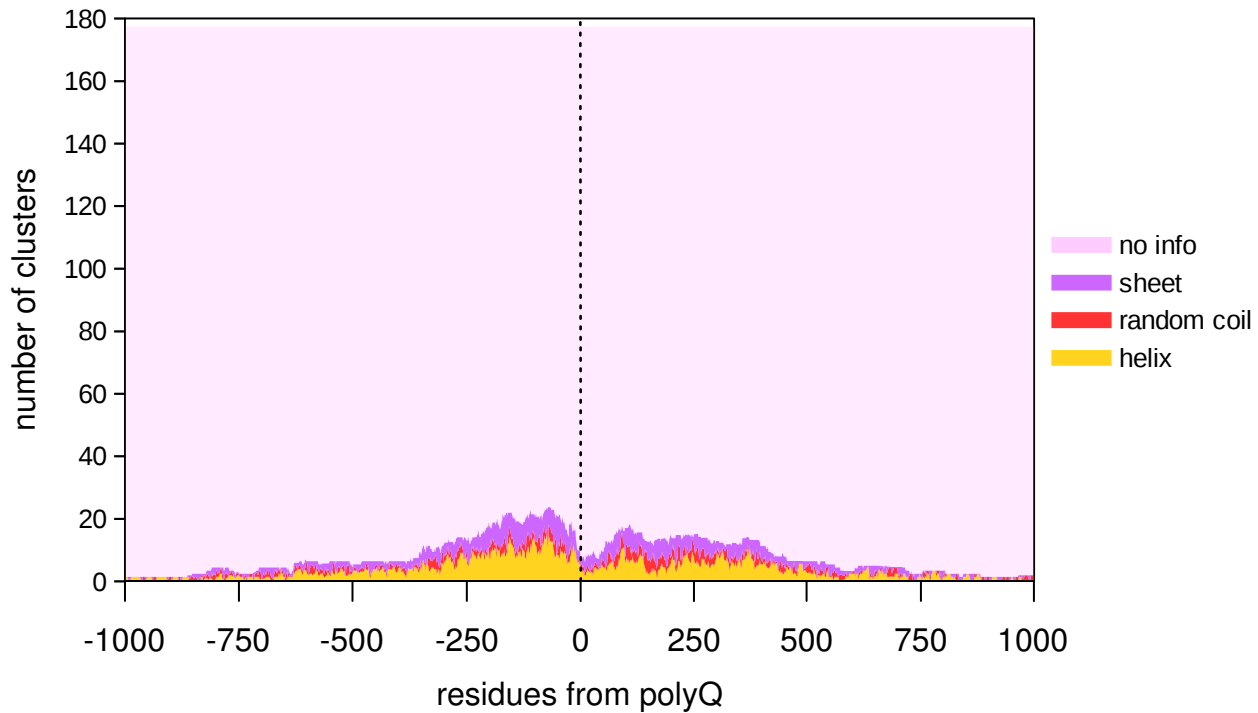

Supplement: pone.0170801.s001.pdf [file pone.0170801.s001.pdf]
